# Supplementary material
Source: Springer Nature journal article supplement (https://www.springermedizin.de/resource/supplementary/12958_2005_261_MOESM7_ESM.pdf/9567490)

**A.**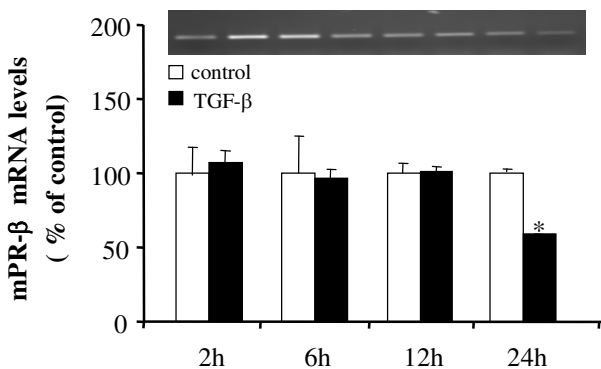**B.**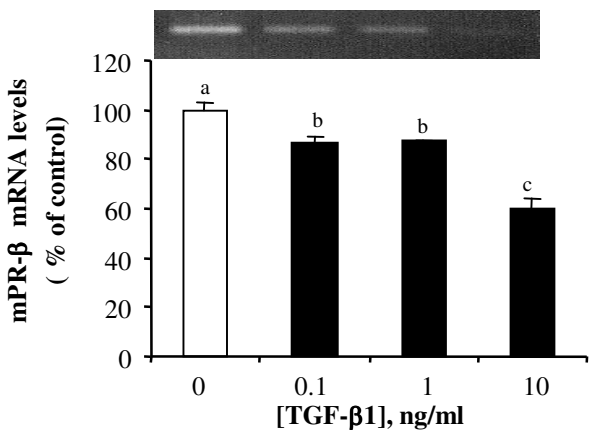**C.**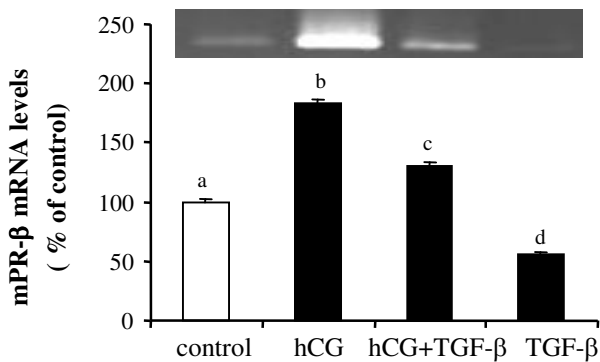

Supplement: MOESM7 [file 9567490]
